# Supplementary material for: Electrocatalytic proton reduction by a model for [NiFeSe] hydrogenases
Source: Royal Society of Chemistry journal article supplement (doi:10.1039/c7dt00972k), 2017-01-01
Supplement: c7dt00972k1.pdf [file c7dt00972k1.pdf]

## Supporting Information

Gamze Gezer,<sup>a</sup> Dinesh Durán Jiménez,<sup>a</sup> Maxime A. Siegler,<sup>b</sup> and Elisabeth Bouwman<sup>\*a</sup>

<sup>1</sup> *Leiden Institute of Chemistry, Leiden University, P.O. Box 9502, 2300 RA Leiden, the Netherlands*

<sup>b</sup> *Department of Chemistry, Johns Hopkins University, 21213 Maryland, U.S.A*

E-mail: bouwman@chem.leidenuniv.nl

### Table of Contents

|                                                                                                            |    |
|------------------------------------------------------------------------------------------------------------|----|
| Table S1: Crystal and structure refinement data for complexes <b>(3)</b> , <b>(5)</b> and <b>(6)</b> ..... | 2  |
| Figure S1: Cyclic voltammogram of <b>(3)</b> with increasing concentration of HOAc.....                    | 4  |
| Figure S2: Cyclic voltammogram of <b>(4)</b> with increasing concentration of HOAc.....                    | 4  |
| Figure S3: Cyclic voltammogram of <b>(3)</b> in a DCM solution.....                                        | 5  |
| Figure S4: Cyclic voltammogram of [FeCp(CO) <sub>2</sub> I] in a DMF solution.....                         | 5  |
| Figure S5: Plot of $i/i_p^0$ vs. $1/1+\exp[F/RT(E-E^0)]$ .....                                             | 6  |
| Figure S6: Calibration curve for CPC experiments.....                                                      | 7  |
| Figure S7: FTIR spectra of the complex <b>(5)</b> .....                                                    | 8  |
| Figure S8: FTIR spectra of the complex <b>(6)</b> .....                                                    | 8  |
| Figure S9: <sup>1</sup> H NMR spectrum of the ligand precursor <b>(1)</b> in DMSO.....                     | 9  |
| Figure S10: <sup>13</sup> C NMR spectrum of the ligand precursor <b>(1)</b> in DMSO.....                   | 10 |
| Figure S11: <sup>1</sup> H NMR spectrum of the complex <b>(3)</b> in DCM.....                              | 11 |
| Figure S12: <sup>1</sup> H NMR spectrum of the complex <b>(5)</b> in DCM.....                              | 12 |
| Figure S13: <sup>1</sup> H NMR spectrum of the complex <b>(5)</b> in DMSO.....                             | 17 |
| Figure S14: <sup>1</sup> H NMR spectrum of the complex <b>(6)</b> in DCM.....                              | 17 |
| Figure S15: <sup>1</sup> H NMR spectrum of the complex <b>(6)</b> in DMSO.....                             | 18 |
| Figure S16: <sup>1</sup> H NMR spectrum of the complex <b>(6)</b> in DCM at different temperature.....     | 19 |
| Figure S17: ESI-MS of ligand precursor <b>(1)</b> in H <sub>2</sub> O.....                                 | 19 |
| Figure S18: HR-MS of complex <b>(3)</b> in DCM.....                                                        | 19 |
| Figure S19: ESI-MS of complex <b>(5)</b> in MeCN.....                                                      | 19 |
| Figure S20: ESI-MS of complex <b>(6)</b> in MeCN.....                                                      | 19 |
| References.....                                                                                            | 19 |

Table S1: Crystal and structure refinement data for complexes **(3)**, **(5)** and **(6)**

Experiments were carried out at 110 K using a SuperNova, Dual, Cu at zero, Atlas. H-atom parameters were constrained.

|                                                                            | <b>(3)</b>                                                                                                                                                                                                                                                                                                                                                                | <b>(5)</b>                                                                                                                                                                                                                                                     | <b>(6)</b>                                                                                                                                                                                                                                                                                                                                                                |
|----------------------------------------------------------------------------|---------------------------------------------------------------------------------------------------------------------------------------------------------------------------------------------------------------------------------------------------------------------------------------------------------------------------------------------------------------------------|----------------------------------------------------------------------------------------------------------------------------------------------------------------------------------------------------------------------------------------------------------------|---------------------------------------------------------------------------------------------------------------------------------------------------------------------------------------------------------------------------------------------------------------------------------------------------------------------------------------------------------------------------|
| Crystal data                                                               |                                                                                                                                                                                                                                                                                                                                                                           |                                                                                                                                                                                                                                                                |                                                                                                                                                                                                                                                                                                                                                                           |
| Chemical formula                                                           | C <sub>11</sub> H <sub>22</sub> NiS <sub>2</sub> Se <sub>2</sub>                                                                                                                                                                                                                                                                                                          | C <sub>17</sub> H <sub>27</sub> FeNiOS <sub>2</sub> Se <sub>2</sub> ·F <sub>6</sub> P                                                                                                                                                                          | C <sub>22</sub> H <sub>29</sub> FeNiOS <sub>2</sub> Se <sub>2</sub> ·F <sub>6</sub> P<br>·CH <sub>2</sub> Cl <sub>2</sub>                                                                                                                                                                                                                                                 |
| $M_r$                                                                      | 435.03                                                                                                                                                                                                                                                                                                                                                                    | 728.95                                                                                                                                                                                                                                                         | 875.95                                                                                                                                                                                                                                                                                                                                                                    |
| Crystal system, space group                                                | Monoclinic, $P2_1$                                                                                                                                                                                                                                                                                                                                                        | Trigonal, $R-3:H$                                                                                                                                                                                                                                              | Monoclinic, $P2_1/c$                                                                                                                                                                                                                                                                                                                                                      |
| $a, b, c$ (Å)                                                              | 7.2301 (2), 10.3586 (2), 10.5707 (3)                                                                                                                                                                                                                                                                                                                                      | 31.5009 (7), 31.5009 (7), 14.4145 (4)                                                                                                                                                                                                                          | 10.32665 (13), 22.8030 (2), 13.72057 (17)                                                                                                                                                                                                                                                                                                                                 |
| $\alpha, \beta, \gamma$ (°)                                                | 90, 103.465 (3), 90                                                                                                                                                                                                                                                                                                                                                       | 90, 90, 120                                                                                                                                                                                                                                                    | 90, 105.9916 (13), 90                                                                                                                                                                                                                                                                                                                                                     |
| $V$ (Å <sup>3</sup> )                                                      | 769.92 (4)                                                                                                                                                                                                                                                                                                                                                                | 12387.3 (6)                                                                                                                                                                                                                                                    | 3105.87 (6)                                                                                                                                                                                                                                                                                                                                                               |
| $Z$                                                                        | 2                                                                                                                                                                                                                                                                                                                                                                         | 18                                                                                                                                                                                                                                                             | 4                                                                                                                                                                                                                                                                                                                                                                         |
| Radiation type                                                             | Mo $K\alpha$                                                                                                                                                                                                                                                                                                                                                              | Cu $K\alpha$                                                                                                                                                                                                                                                   | Cu $K\alpha$                                                                                                                                                                                                                                                                                                                                                              |
| $\mu$ (mm <sup>-1</sup> )                                                  | 6.23                                                                                                                                                                                                                                                                                                                                                                      | 10.52                                                                                                                                                                                                                                                          | 11.00                                                                                                                                                                                                                                                                                                                                                                     |
| Crystal size (mm)                                                          | 0.26 × 0.19 × 0.03                                                                                                                                                                                                                                                                                                                                                        | 0.18 × 0.05 × 0.04                                                                                                                                                                                                                                             | 0.36 × 0.08 × 0.04                                                                                                                                                                                                                                                                                                                                                        |
| Data collection                                                            |                                                                                                                                                                                                                                                                                                                                                                           |                                                                                                                                                                                                                                                                |                                                                                                                                                                                                                                                                                                                                                                           |
| Absorption correction                                                      | Analytical<br><i>CrysAlis PRO</i> , Agilent Technologies, Version 1.171.36.32 (release 02-08-2013<br><i>CrysAlis171 .NET</i> ) (compiled Aug 2 2013,16:46:58)<br>Analytical numeric absorption correction using a multifaceted crystal model based on expressions derived by R.C. Clark & J.S. Reid. (Clark, R. C. & Reid, J. S. (1995). <i>Acta Cryst.</i> A51, 887-897) | Gaussian<br><i>CrysAlis PRO</i> , Agilent Technologies, Version 1.171.36.32 (release 02-08-2013<br><i>CrysAlis171 .NET</i> ) (compiled Aug 2 2013,16:46:58)<br>Numerical absorption correction based on gaussian integration over a multifaceted crystal model | Analytical<br><i>CrysAlis PRO</i> , Agilent Technologies, Version 1.171.36.32 (release 02-08-2013<br><i>CrysAlis171 .NET</i> ) (compiled Aug 2 2013,16:46:58)<br>Analytical numeric absorption correction using a multifaceted crystal model based on expressions derived by R.C. Clark & J.S. Reid. (Clark, R. C. & Reid, J. S. (1995). <i>Acta Cryst.</i> A51, 887-897) |
| $T_{\min}, T_{\max}$                                                       | 0.316, 0.839                                                                                                                                                                                                                                                                                                                                                              | 0.414, 0.788                                                                                                                                                                                                                                                   | 0.161, 0.716                                                                                                                                                                                                                                                                                                                                                              |
| No. of measured, independent and observed [ $I > 2\sigma(I)$ ] reflections | 11826, 3544, 3416                                                                                                                                                                                                                                                                                                                                                         | 16503, 5401, 4525                                                                                                                                                                                                                                              | 20451, 6094, 5655                                                                                                                                                                                                                                                                                                                                                         |
| $R_{\text{int}}$                                                           | 0.030                                                                                                                                                                                                                                                                                                                                                                     | 0.032                                                                                                                                                                                                                                                          | 0.033                                                                                                                                                                                                                                                                                                                                                                     |
| $(\sin \theta/\lambda)_{\text{max}}$ (Å <sup>-1</sup> )                    | 0.649                                                                                                                                                                                                                                                                                                                                                                     | 0.616                                                                                                                                                                                                                                                          | 0.616                                                                                                                                                                                                                                                                                                                                                                     |
| Refinement                                                                 |                                                                                                                                                                                                                                                                                                                                                                           |                                                                                                                                                                                                                                                                |                                                                                                                                                                                                                                                                                                                                                                           |

|                                                     |                                                                                                                              |                                                                                      |                                                                                     |
|-----------------------------------------------------|------------------------------------------------------------------------------------------------------------------------------|--------------------------------------------------------------------------------------|-------------------------------------------------------------------------------------|
| $R[F^2 > 2\sigma(F^2)],$<br>$wR(F^2), S$            | 0.022, 0.050, 1.04                                                                                                           | 0.039, 0.084, 1.06                                                                   | 0.030, 0.077, 1.03                                                                  |
| No. of reflections                                  | 3544                                                                                                                         | 5401                                                                                 | 6094                                                                                |
| No. of parameters                                   | 149                                                                                                                          | 284                                                                                  | 405                                                                                 |
| No. of restraints                                   | 1                                                                                                                            | 0                                                                                    | 181                                                                                 |
|                                                     | $w = 1/[\sigma^2(F_o^2) + (0.0249P)^2 + 0.0526P]$<br>where $P = (F_o^2 + 2F_c^2)/3$                                          | $w = 1/[\sigma^2(F_o^2) + (0.0255P)^2 + 67.0697P]$<br>where $P = (F_o^2 + 2F_c^2)/3$ | $w = 1/[\sigma^2(F_o^2) + (0.0416P)^2 + 2.5519P]$<br>where $P = (F_o^2 + 2F_c^2)/3$ |
| $\Delta_{\max}, \Delta_{\min}$ (e Å <sup>-3</sup> ) | 0.47, -0.33                                                                                                                  | 0.47, -0.92                                                                          | 0.90, -0.89                                                                         |
| Absolute structure                                  | Flack x determined using 1521 quotients [(I+)-(I-)]/[(I+)+(I-)] (Parsons, Flack and Wagner, Acta Cryst. B69 (2013) 249-259). | –                                                                                    | –                                                                                   |
| Absolute structure parameter                        | 0.002 (5)                                                                                                                    | –                                                                                    | –                                                                                   |

Computer programs: *CrysAlis PRO*, Agilent Technologies, Version 1.171.36.32 (release 02-08-2013 CrysAlis171 .NET) (compiled Aug 2 2013, 16:46:58), *SHELXS2014/7* (Sheldrick, 2015), *SHELXS2014/7* (Sheldrick, 2014), *SHELXL2014/7* (Sheldrick, 2015), *SHELXL2014/7* (Sheldrick, 2014), *SHELXTL* v6.10 (Sheldrick, 2008).

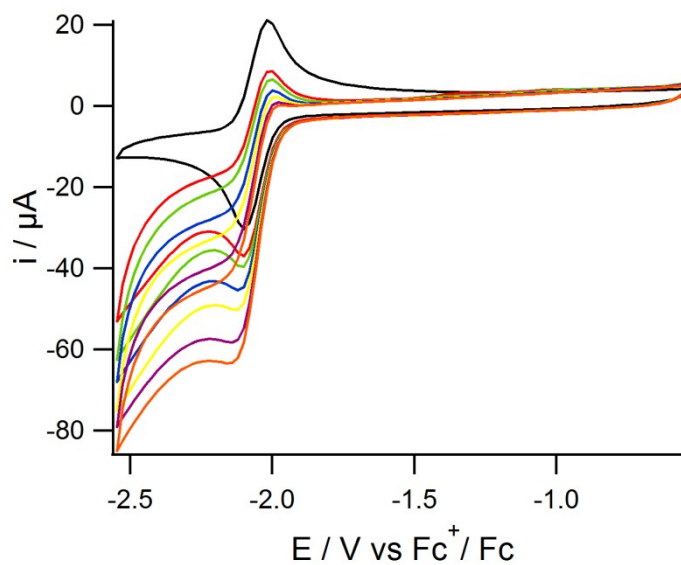

Figure S1: Cyclic voltammogram of [Ni(pbSmSe)] (**3**) in a DMF solution of TBAPF<sub>6</sub> (0.1 M) on a glassy carbon electrode at 200 mV s<sup>-1</sup> with 0 (black), 10 (red), 20 (green), 30 (blue), 40 (yellow), 50 (purple), 60 (orange) mM of acetic acid.

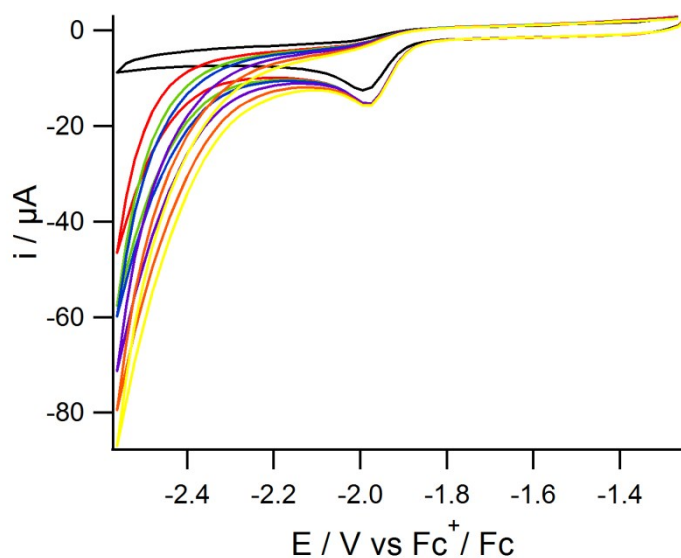

Figure S2: Cyclic voltammogram of [Ni(xbSmSe)] (**4**) in a DMF solution of TBAPF<sub>6</sub> (0.1 M) on a glassy carbon electrode at 200 mV s<sup>-1</sup> with 0 (black), 10 (red), 20 (green), 30 (blue), 40 (yellow), 50 (purple), 60 (orange) mM of acetic acid.

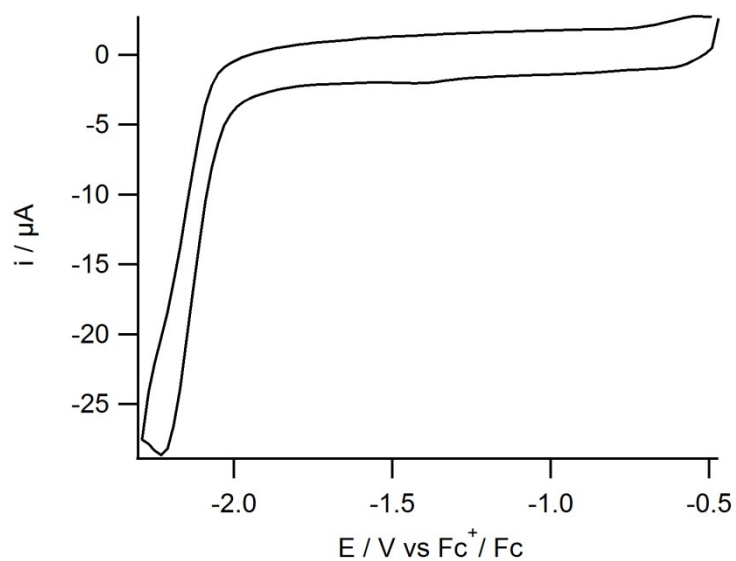

Figure S3: Cyclic voltammogram of [Ni(pbSmSe)] (**3**) in a DCM solution of TBAPF<sub>6</sub> (0.1 M) on a glassy carbon electrode at 200 mV s<sup>-1</sup>.

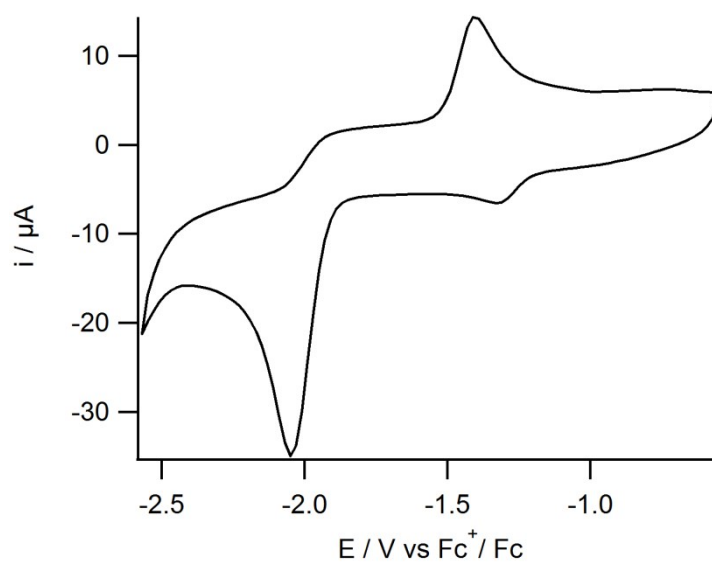

Figure S4: Cyclic voltammogram of [FeCp(CO)<sub>2</sub>I] in a DMF solution of TBAPF<sub>6</sub> (0.1 M) on a glassy carbon electrode at 200 mV s<sup>-1</sup>.

## Foot-of-the Wave Analysis

CV results were analyzed by using *FOWA* which helps to quantify the rates of HER. The observable rate constant ( $k_{obs}$ ) can be obtained by plotting  $i/i_p^0$  vs  $1/1+\exp[(F/RT)(E-E^0)]$  which gives a linear function at a certain scan rate.<sup>1,2</sup> For the complex **(5)**, which has diffusion controlled reversible reaction, the current peaks ( $i$  and  $i_p^0$ ) can be calculated according to equation (1) and (2):<sup>1,2</sup>

$$i_p^0 = 0.4463FSC_p^0 \sqrt{\frac{FvD}{RT}} \quad (1)$$

$$i = \frac{2FSC_p^0 \sqrt{\frac{FvD}{RT}}}{1 + \exp\left[\frac{F}{RT}(E - E^0)\right]} \quad (2)$$

where  $i_p^0 = 90.17 \mu\text{A}$ ,  $F$  is the Faraday's constant,  $S$  the surface of electrode,  $C_p^0$  the concentration of the complex in solution,  $D$  the diffusion coefficient,  $E^0$  the half-wave potential of the redox couple triggering catalysis,  $R$  the gas constant and  $T$  the temperature. Combining equation (1) and (2) gives us equation (3) which shows us plotting  $i/i_p^0$  vs  $1/1+\exp[(F/RT)(E-E^0)]$  gives access of the observed rate constant ( $k_{obs}$ ).

$$\frac{i}{i_p^0} = \frac{\frac{2}{0.4463} \sqrt{\frac{RT(k_{obs})}{Fv}}}{1 + \exp\left[\frac{F}{RT}(E - E^0)\right]} \quad (3)$$

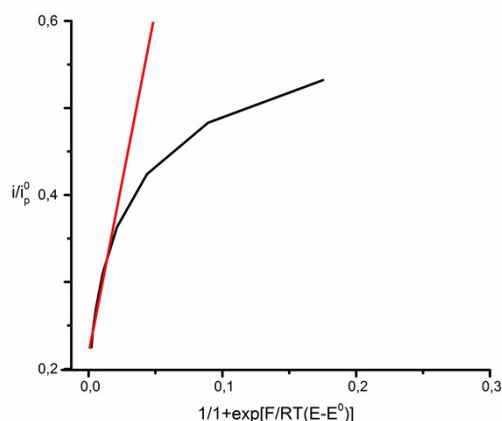

| $i$ ( $\mu\text{A}$ ) | $i / i_p^0$ | $1/1+\exp[F/RT(E-E^0)]$ |
|-----------------------|-------------|-------------------------|
| 20.25                 | 0.225       | $9.022 \times 10^{-4}$  |
| 21.93                 | 0.243       | $1.964 \times 10^{-3}$  |
| 24.38                 | 0.270       | $4.269 \times 10^{-3}$  |
| 27.95                 | 0.310       | $9.256 \times 10^{-3}$  |
| 32.74                 | 0.363       | 0.01995                 |
| 38.23                 | 0.424       | 0.04247                 |
| 43.53                 | 0.483       | 0.0881                  |
| 48.01                 | 0.532       | 0.174                   |

Figure S5: Plot of  $i/i_p^0$  vs.  $1/1+\exp[F/RT(E-E^0)]$  using FOWA of the complex **(5)** for  $\text{H}_2$  evolution at  $200 \text{ mV s}^{-1}$  and a concentration of HOAc of  $60 \text{ mM}$ . The experimental data (black) can be fitted linearly near the foot of the catalytic wave and the slope (red) gives the access to the observed rate constant  $k_{obs} = k \times C_A^0$  according to equation (4).<sup>2</sup> Equation (5)<sup>2</sup> gives us access to  $k$  which is  $402 \text{ M}^{-1}\text{s}^{-1}$  and  $k_{obs}$  is  $24 \text{ s}^{-1}$ .

$$\text{slope} = \frac{2}{0.4463} \sqrt{(k_{obs}) \frac{RT}{Fv}} \quad (4)$$

$$k = \frac{\text{slope}^2(0.4463)^2 Fv}{4RTC_A^0} \quad (5)$$

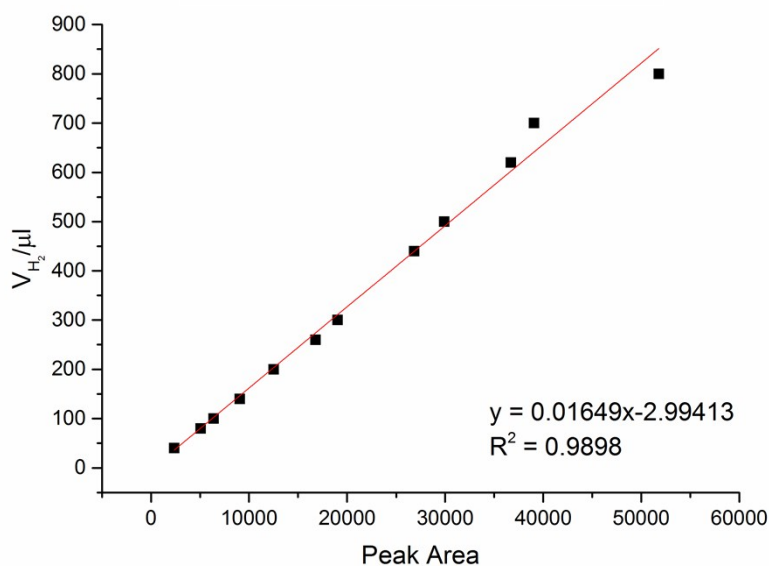

Figure S6: Calibration line used for CPC experiments. The observed peak areas of the GC are plotted against the volume of H<sub>2</sub> in the sample with an R<sup>2</sup> value of 0.9898.

Calculations are based on a calibration line obtained by the external reference method by injection of known amounts of H<sub>2</sub> into the system (Fig.S5). During the CPC experiment hydrogen is only produced from the local concentration of catalyst at the electrode surface. For this measurement, a glassy carbon electrode with 3 mm diameter was used. After 50 min the area of the H<sub>2</sub> peak is 4054 for the complex **(5)** and according to the equation from calibration line (Fig.S5):

$$y = (0.01649 \times 4054) - 2.99413 = 64 \mu\text{l H}_2$$

$$(64 \times 10^{-6}) \div (24.465) = 2.6 \mu\text{mol H}_2$$

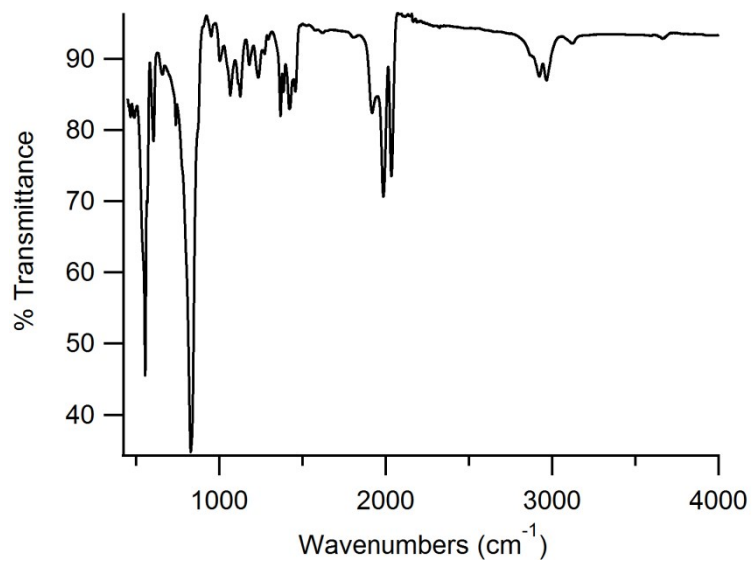

Figure S7: FTIR spectrum of the complex **(5)**.

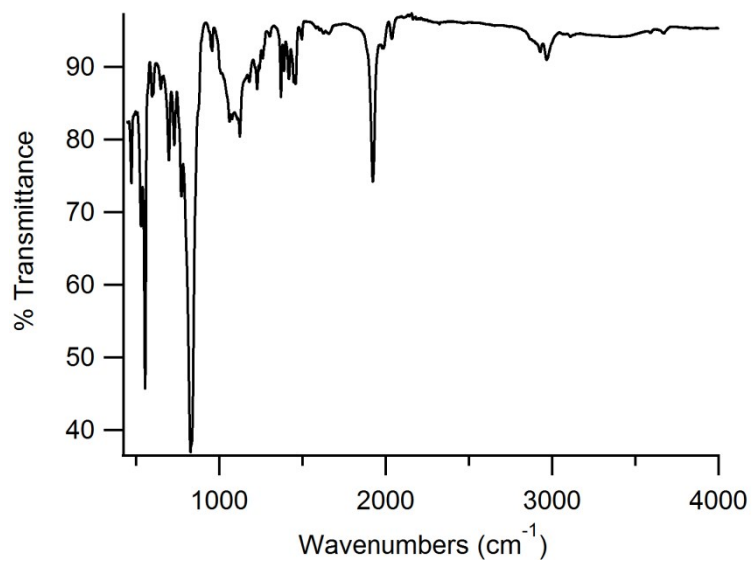

Figure S8: FTIR spectrum of the complex **(6)**.



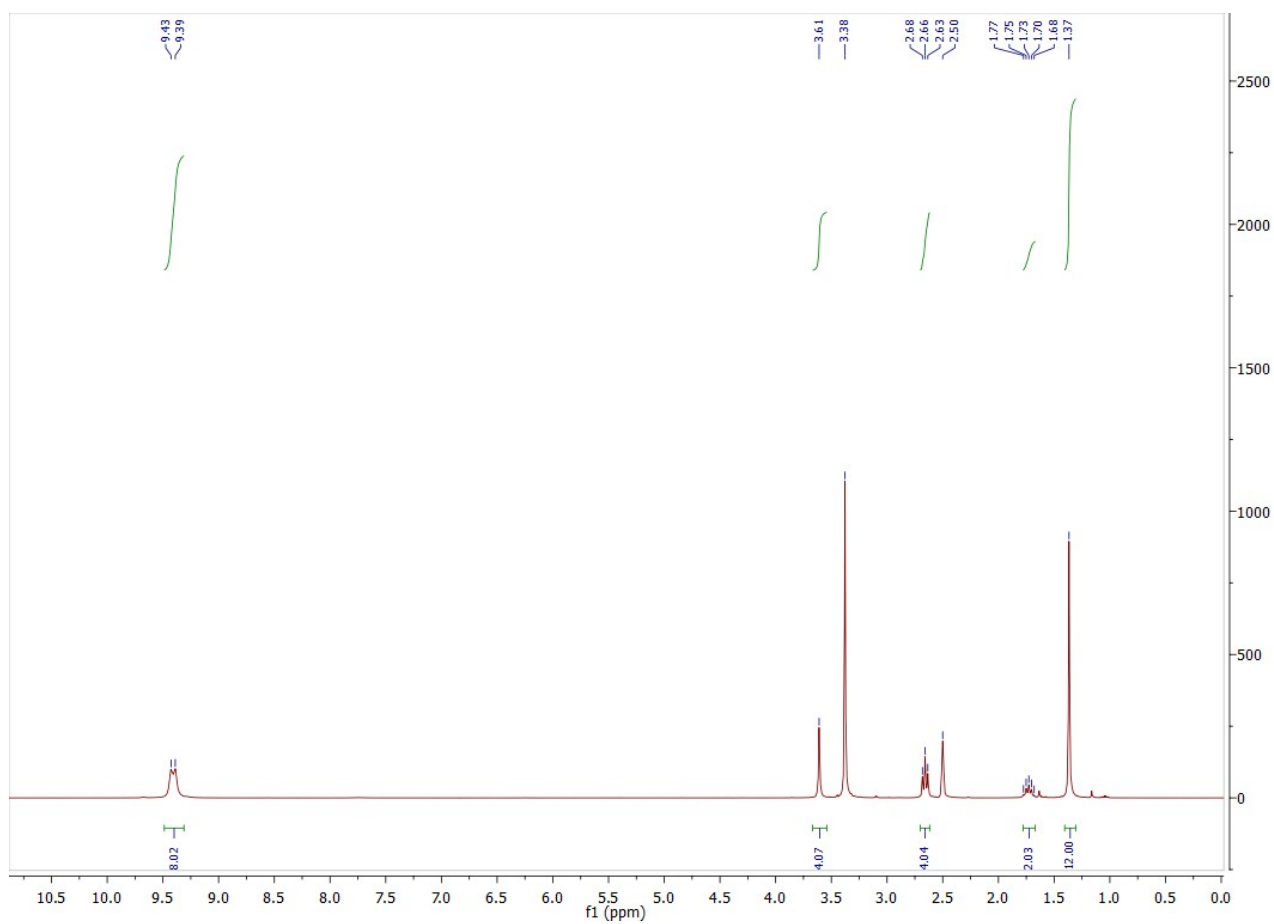

Figure S9:  $^1\text{H}$  NMR spectrum of the ligand precursor (1) in DMSO.

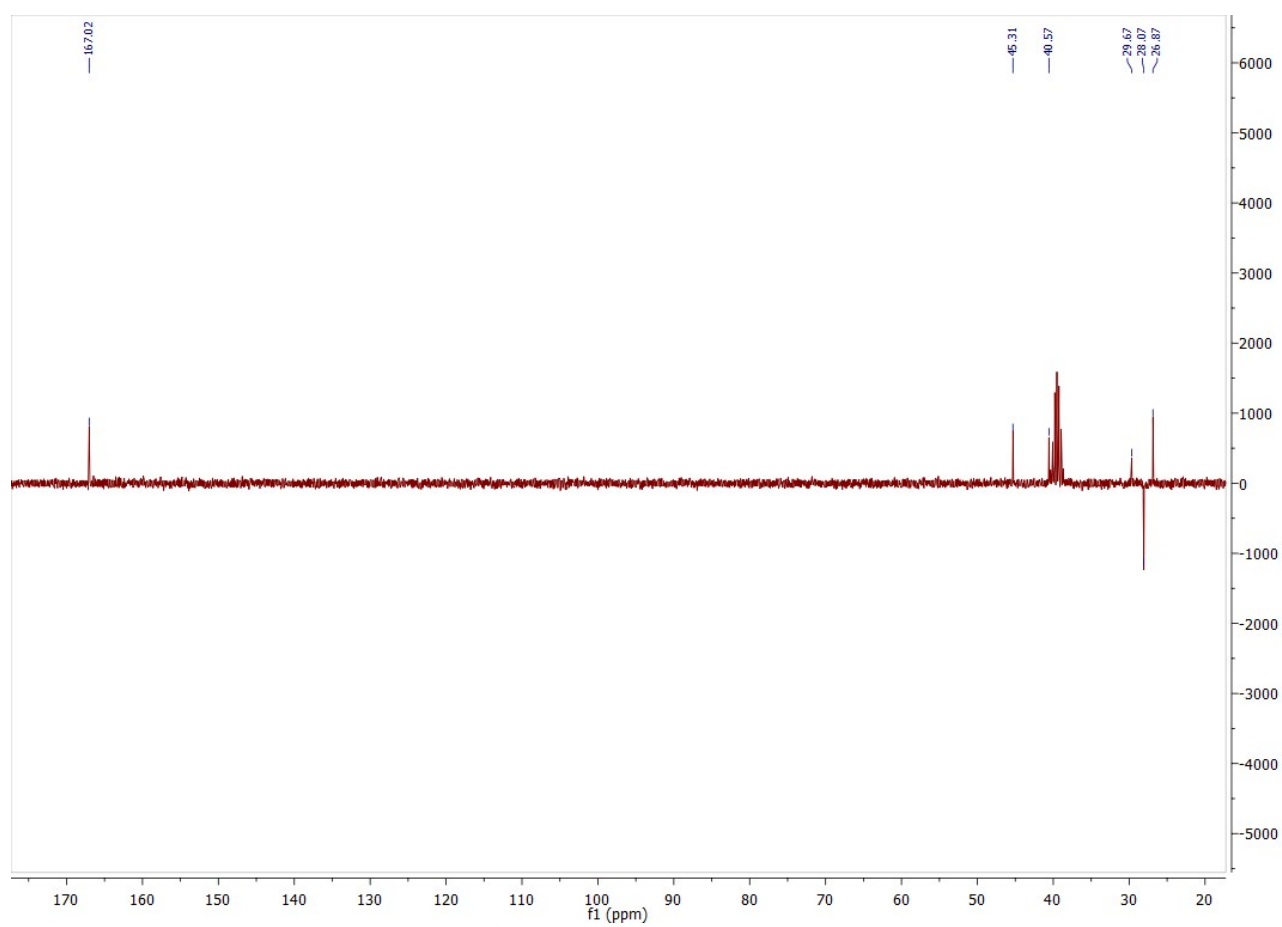

Figure S10:  $^{13}\text{C}$  NMR spectrum of the ligand precursor (**1**) in DMSO.

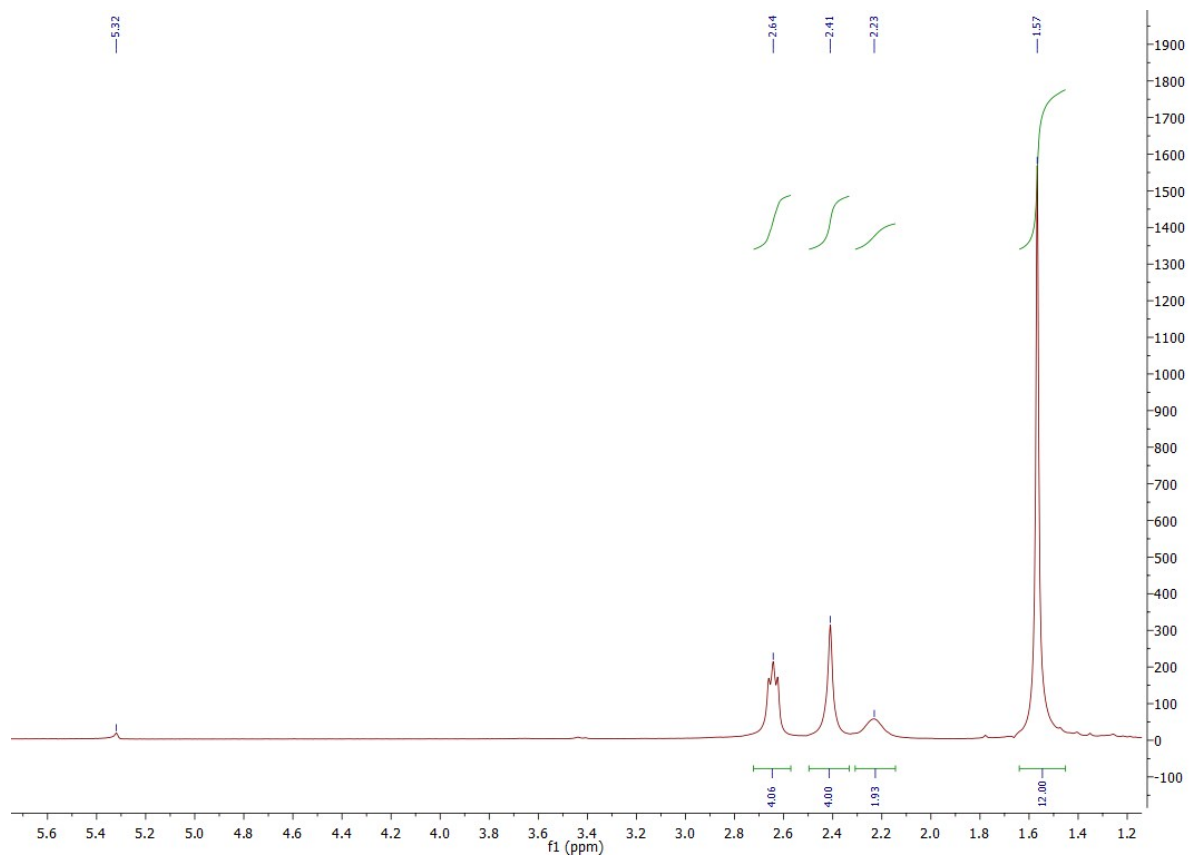

Figure S11:  $^1\text{H}$  NMR spectrum of the complex (3) in DCM.

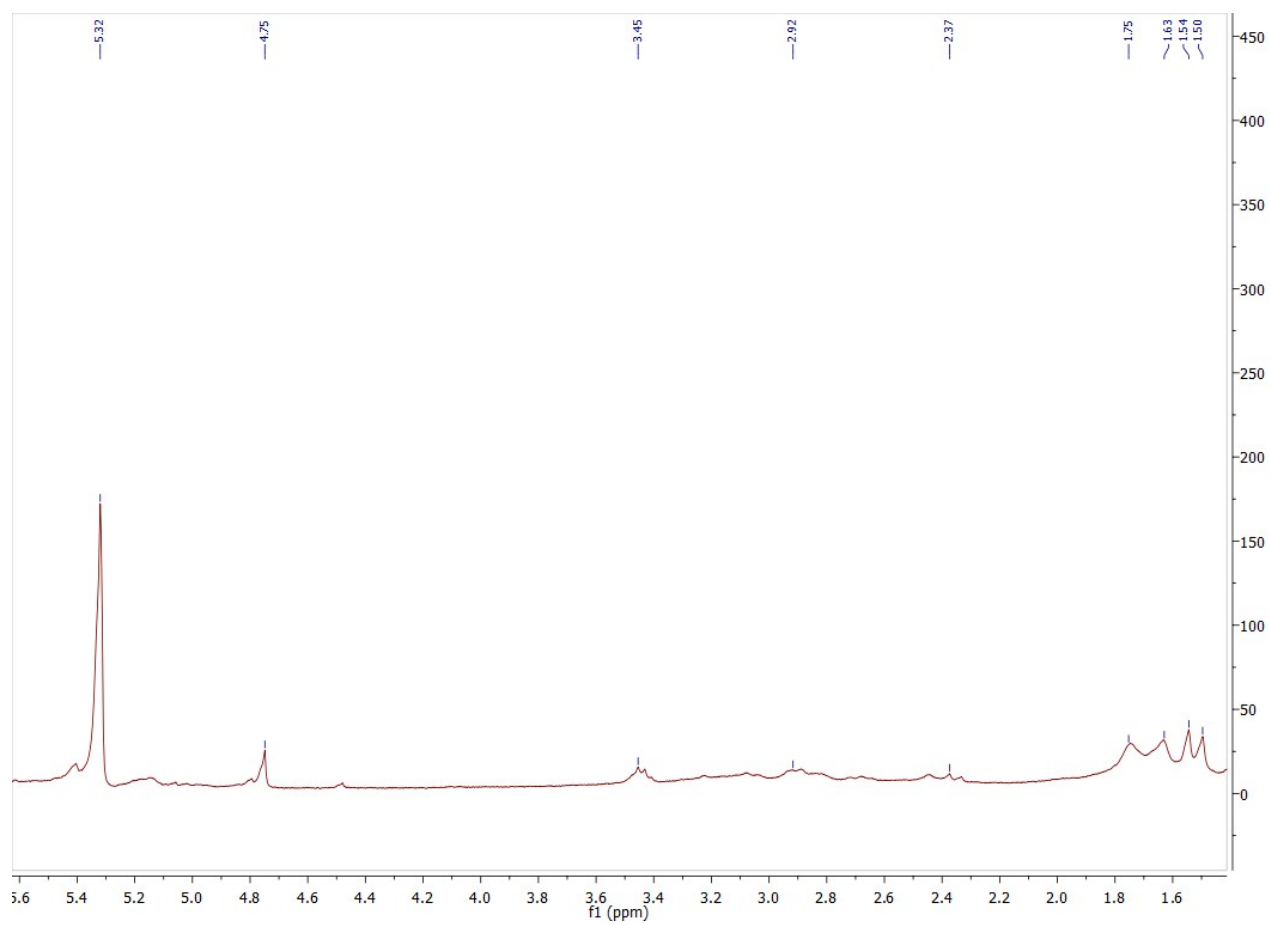

Figure S12:  $^1\text{H}$  NMR spectrum of the complex **(5)** in DCM.

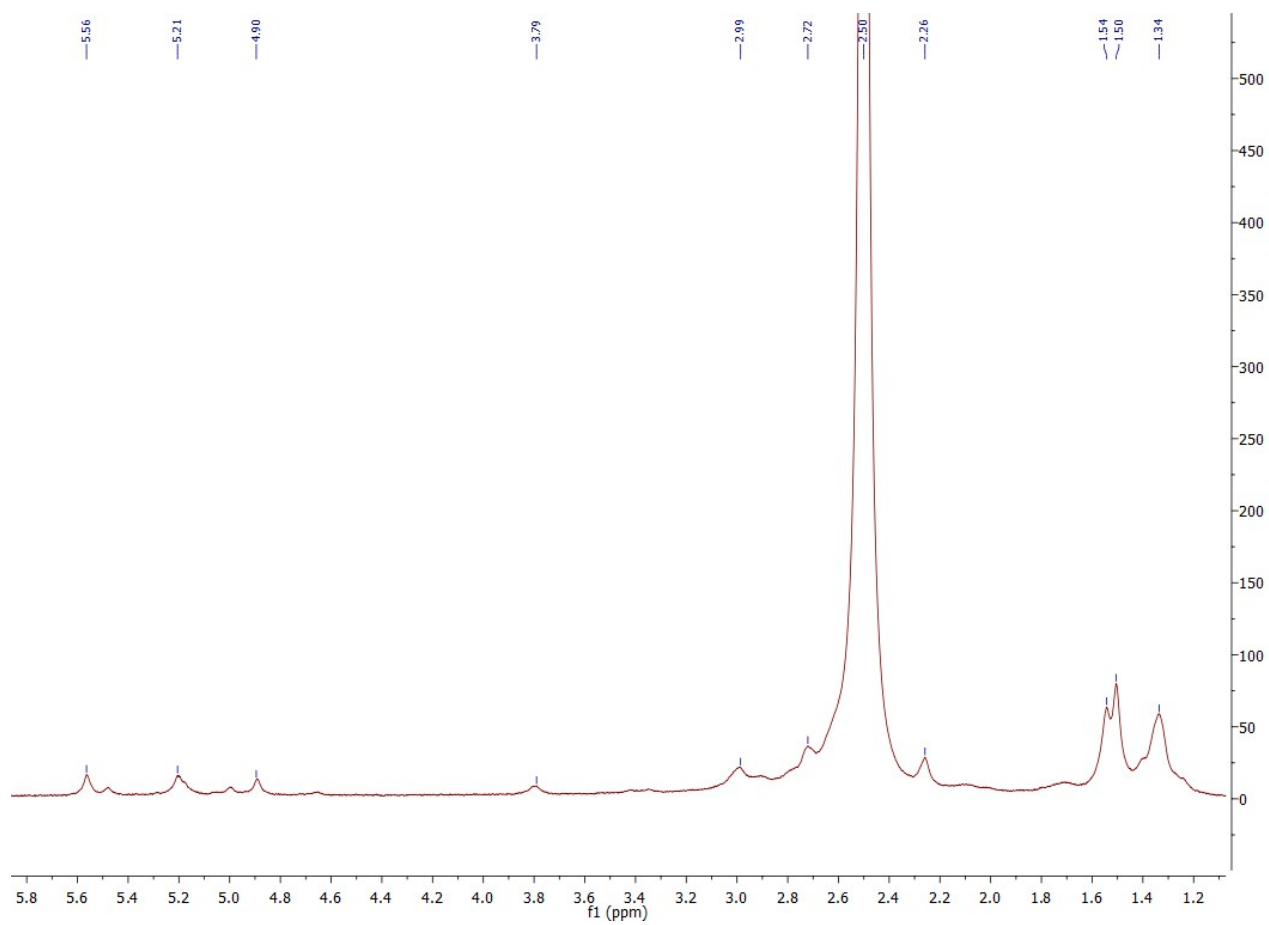

Figure S13:  $^1\text{H}$  NMR spectrum of the complex (5) in DMSO.

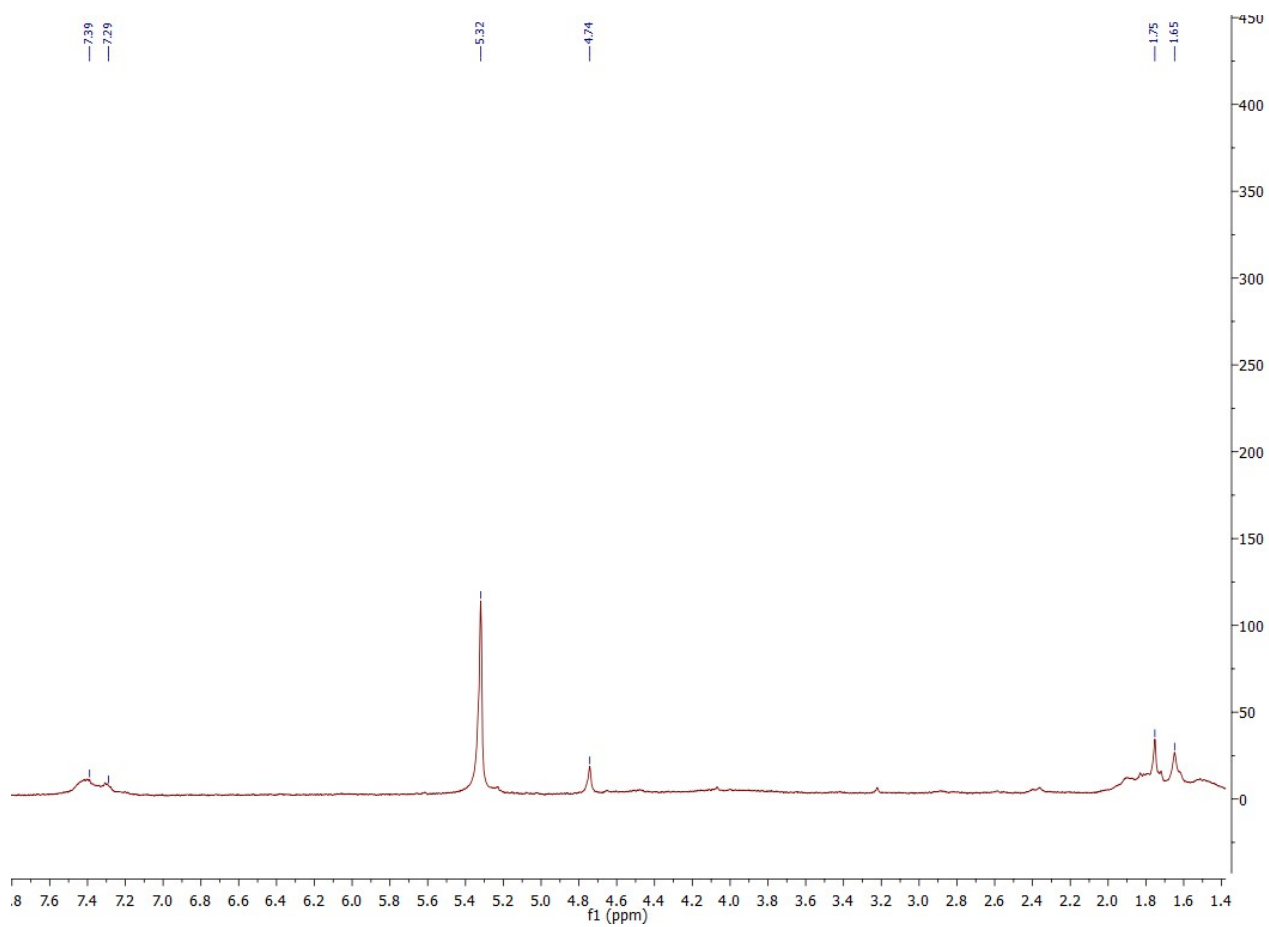

Figure S14:  $^1\text{H}$  NMR spectrum of the complex (6) in  $\text{DCM}$ .

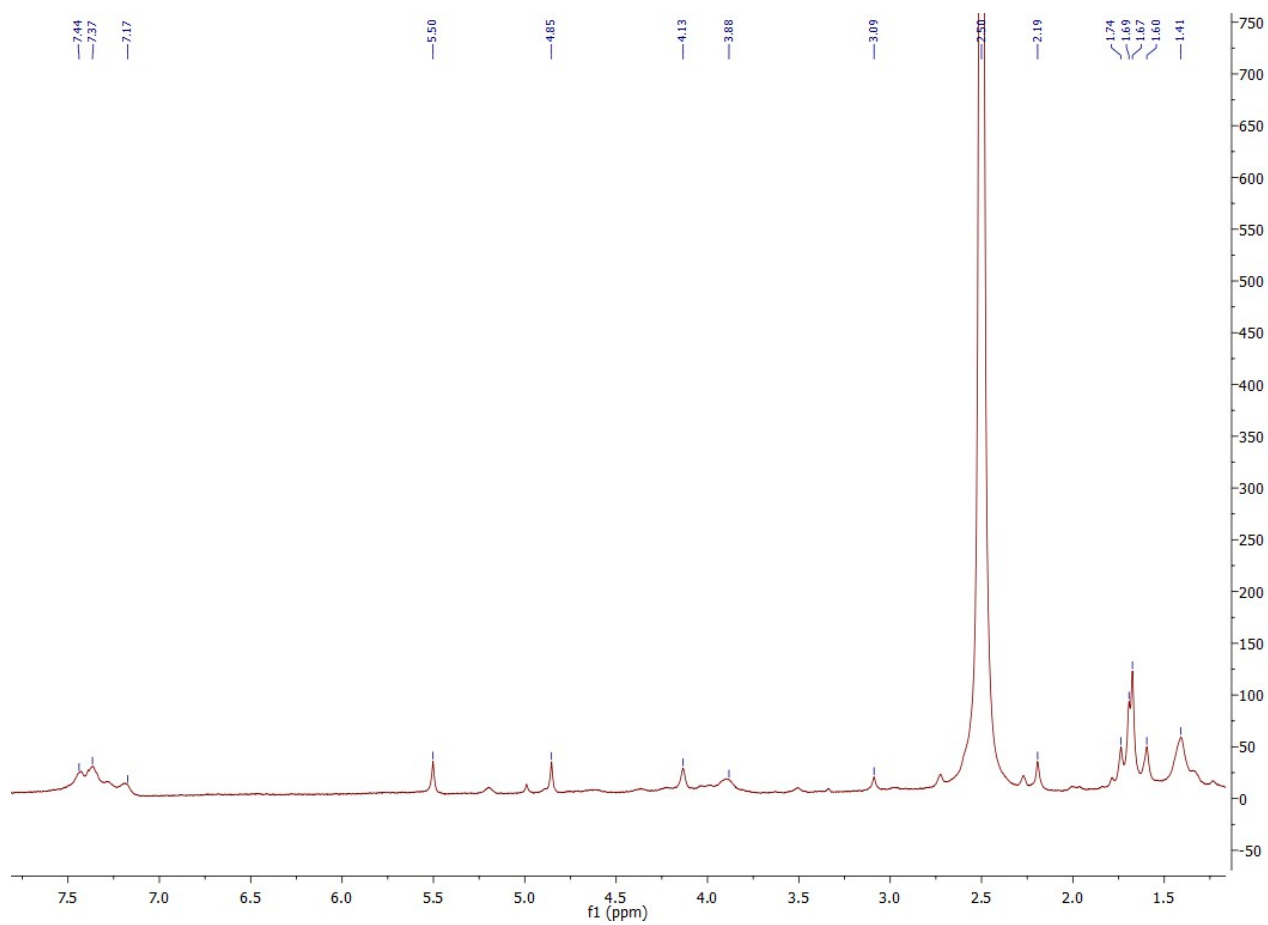

Figure S15:  $^1\text{H}$  NMR spectrum of the complex (6) in DMSO.

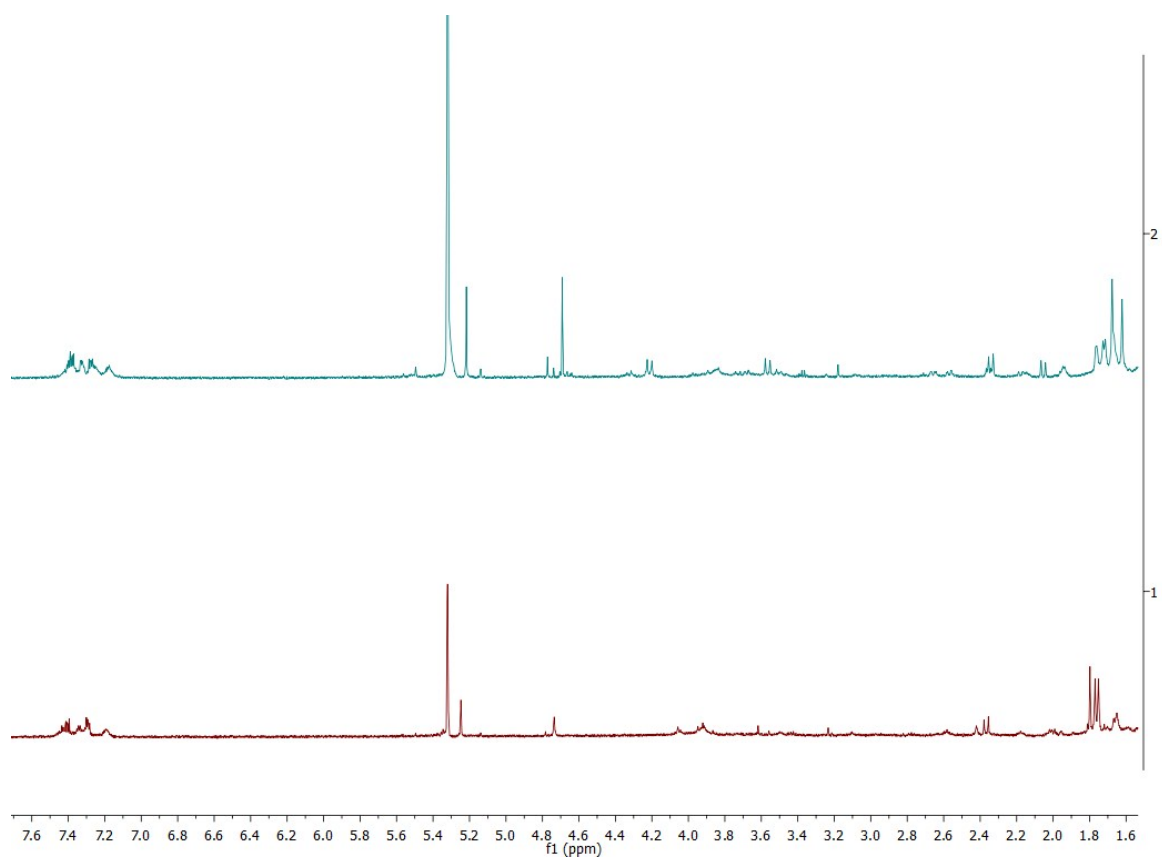

Figure S16:  $^1\text{H}$  NMR spectrum of the complex (6) in DCM 214 K (top) and 296 K (bottom).



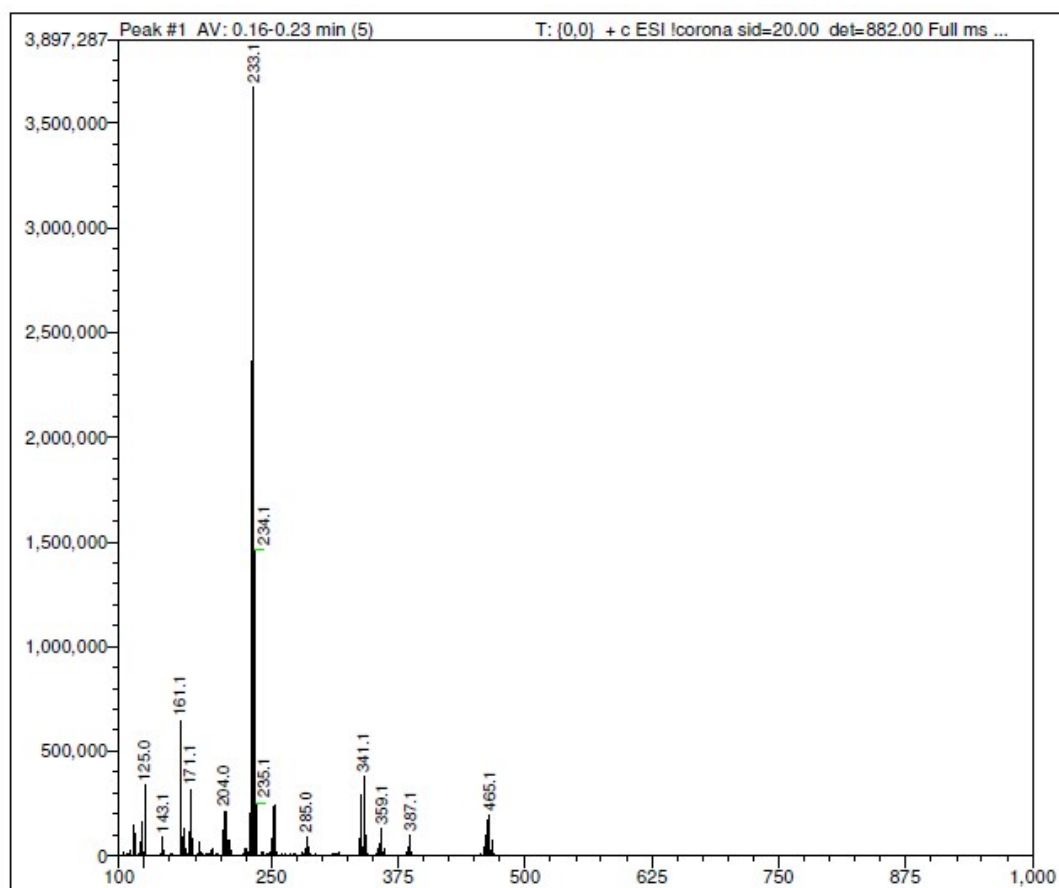

Figure S17: ESI-MS of ligand precursor (**1**) in H<sub>2</sub>O: 233.1, calcd: 233.01 [M-2Cl]<sup>2+</sup>.

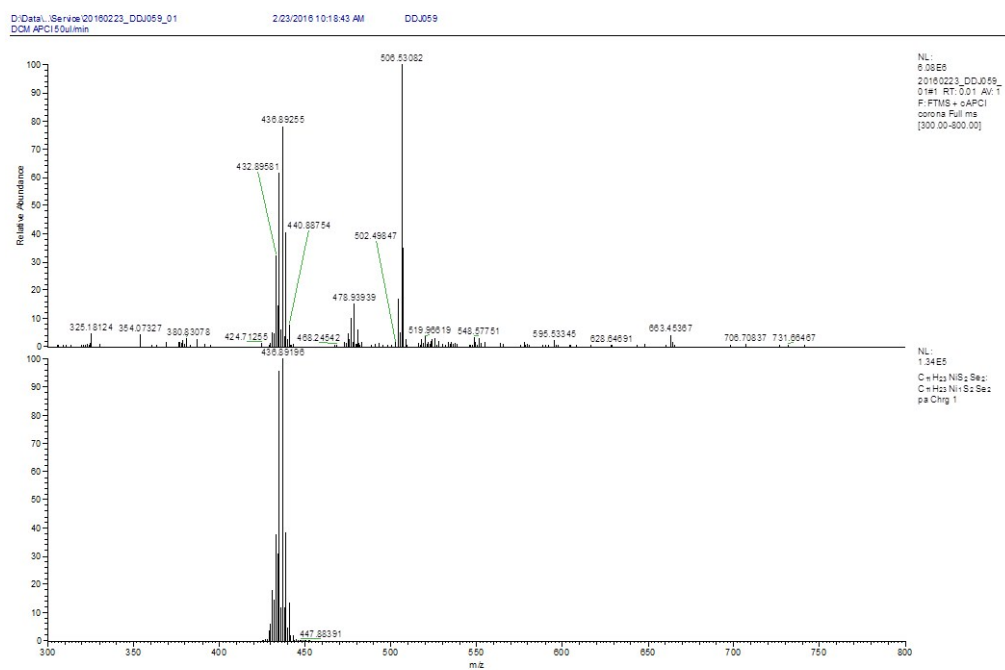

Figure S18: HR-MS of complex (**3**) in DCM: 436.89255, calcd: 436.89196 [M+H]<sup>+</sup> experimental spectrum (top) and simulated spectrum (bottom).

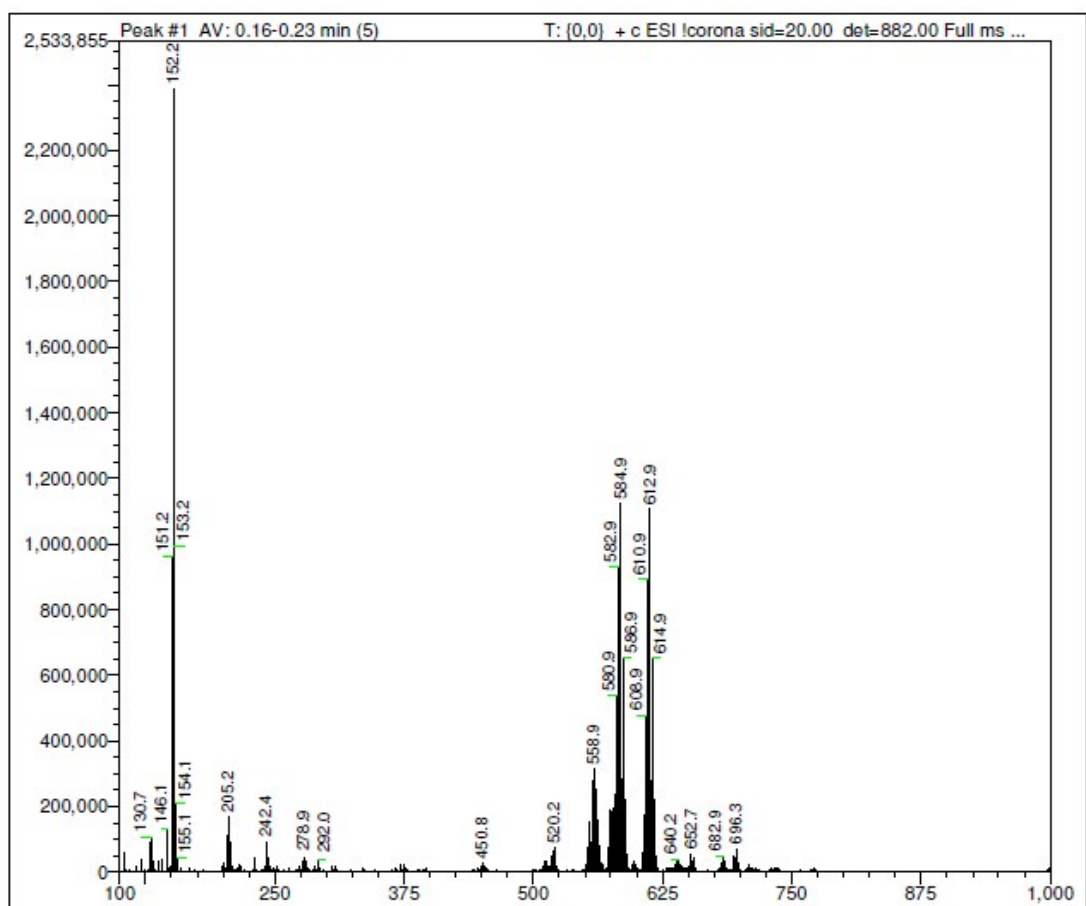

Figure S19: ESI-MS of complex (**5**) in MeCN: 584.9, calcd: 584.9  $[M-PF_6]^+$ , 612.9, calcd: 612.9  $[M-(PF_6)+(CO)]^+$ , 556.9, calcd: 556.9  $[M-(PF_6)-(CO)]^+$ .

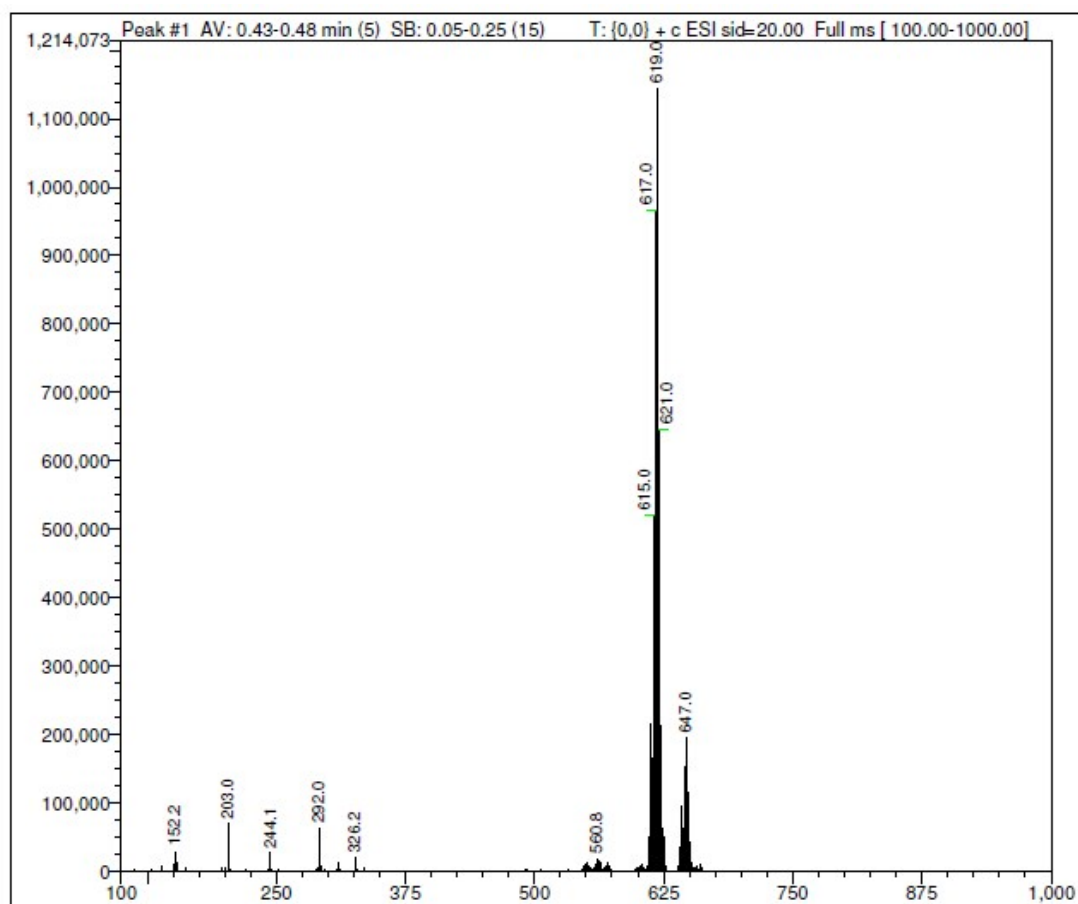

Figure S20: ESI-MS of complex (**6**) in MeCN: 619.0, calcd: 618.9  $[M-CO-PF_6]^+$ , 647.0, calcd: 646.9  $[M-PF_6]^+$ .

## References

- (1) Costentin, C.; Drouet, S.; Robert, M.; Savéant, J.M. *J. Am. Chem. Soc.* 2012, **134**, 11235.
- (2) Elgrishi, N.; Chambers, M. B.; Fontecave, M. *Chemical Sci* 2015, **6**, 2522.
